# Supplementary material
Source: publisher figshare collection journal article supplement (https://acs.figshare.com/ndownloader/files/19187321)
Supplement: Supplementary file 1 [file 19187321]

## Supporting Information

### **Amino acid Conjugated Polymer-Rifampicin Combination: Effective to Tackle Drug-resistant Gram-negative Clinical Isolates**

Swagatam Barman, Sudip Mukherjee, Sreyan Ghosh, and Jayanta Haldar\*

Antimicrobial Research Laboratory, New Chemistry Unit and School of Advanced Materials, Jawaharlal Nehru Centre for Advanced Scientific Research, Jakkur, Bengaluru 560064, Karnataka, India.

Address correspondence to Jayanta Haldar, [jayanta@jncasr.ac.in](mailto:jayanta@jncasr.ac.in)

#### **Table of Contents:**

Page S-2-S-4: Supplementary Figures and Reference

## Supplementary Figures.

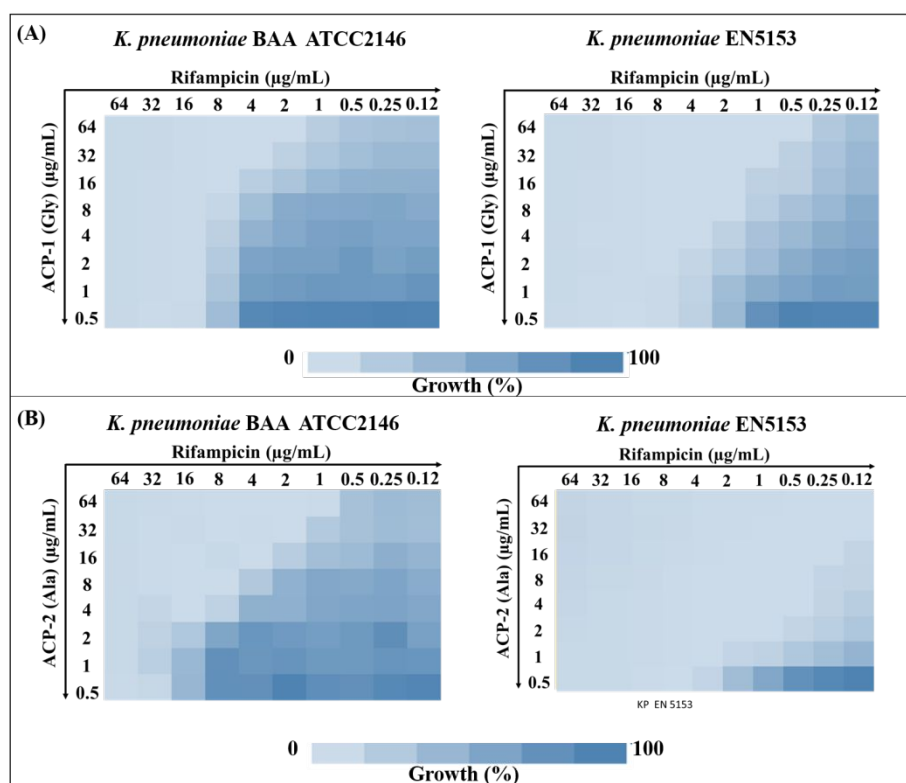

**Figure S1.** Chequerboard assay revealing efficacy of combination of rifampicin with (A) ACP-1 (Gly) and (B) ACP-2 (Ala) against *K. pneumoniae* BAA ATCC2146 and *K. pneumoniae* EN5153.

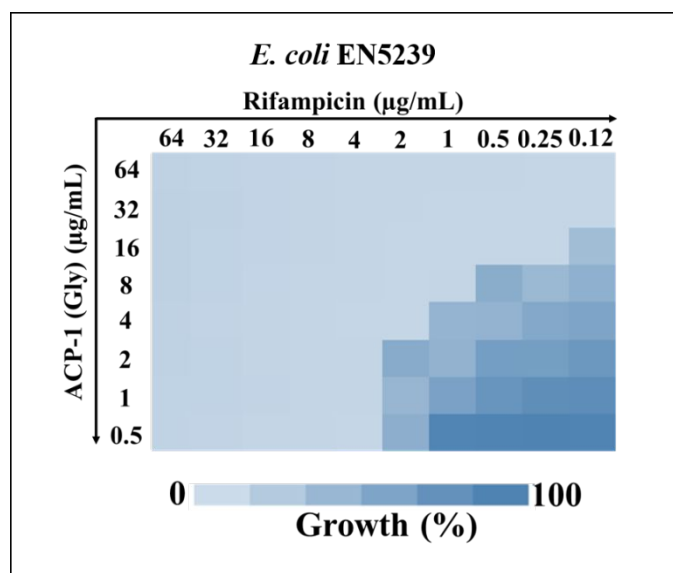

**Figure S2.** Chequerboard assay revealing efficacy of combination of rifampicin with ACP-1 (Gly) against *E. coli* EN5239.

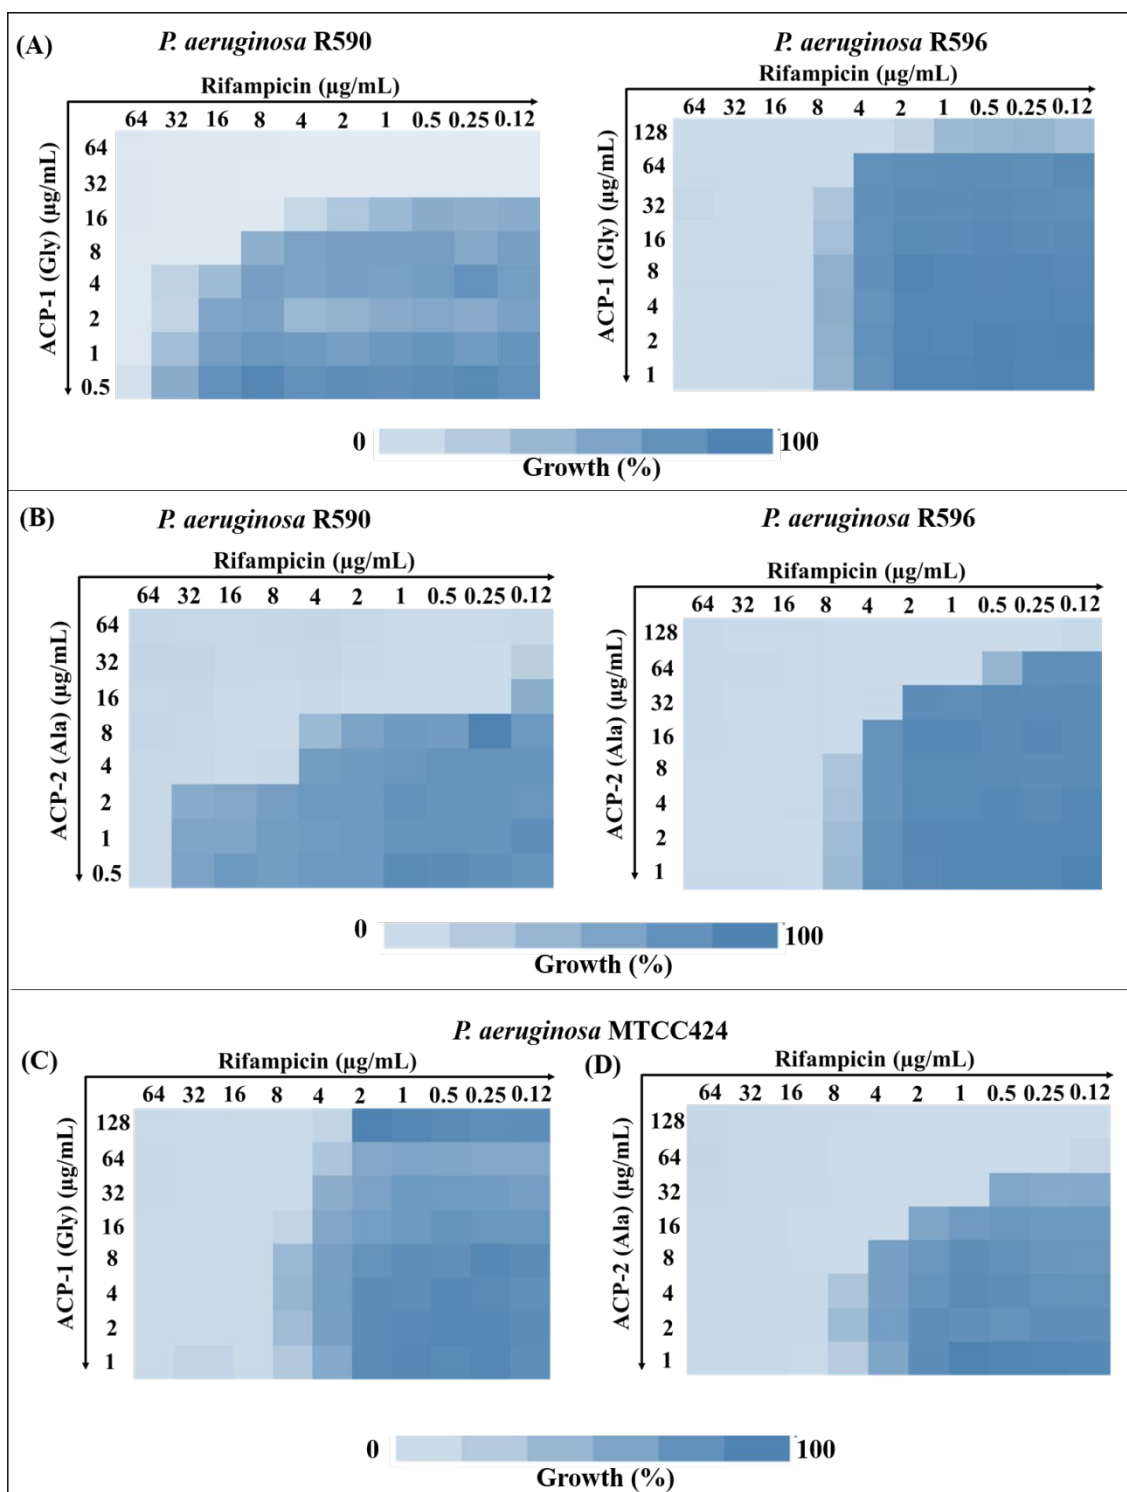

**Figure S3.** Chequerboard assay revealing efficacy of combination of rifampicin with (A) ACP-1 (Gly) and (B) ACP-2 (Ala) against *P. aeruginosa* R590 and *P. aeruginosa* R596; Combination of rifampicin with (C) ACP-1 (Gly), (D) ACP-2 (Ala) against *P. aeruginosa* MTCC424.

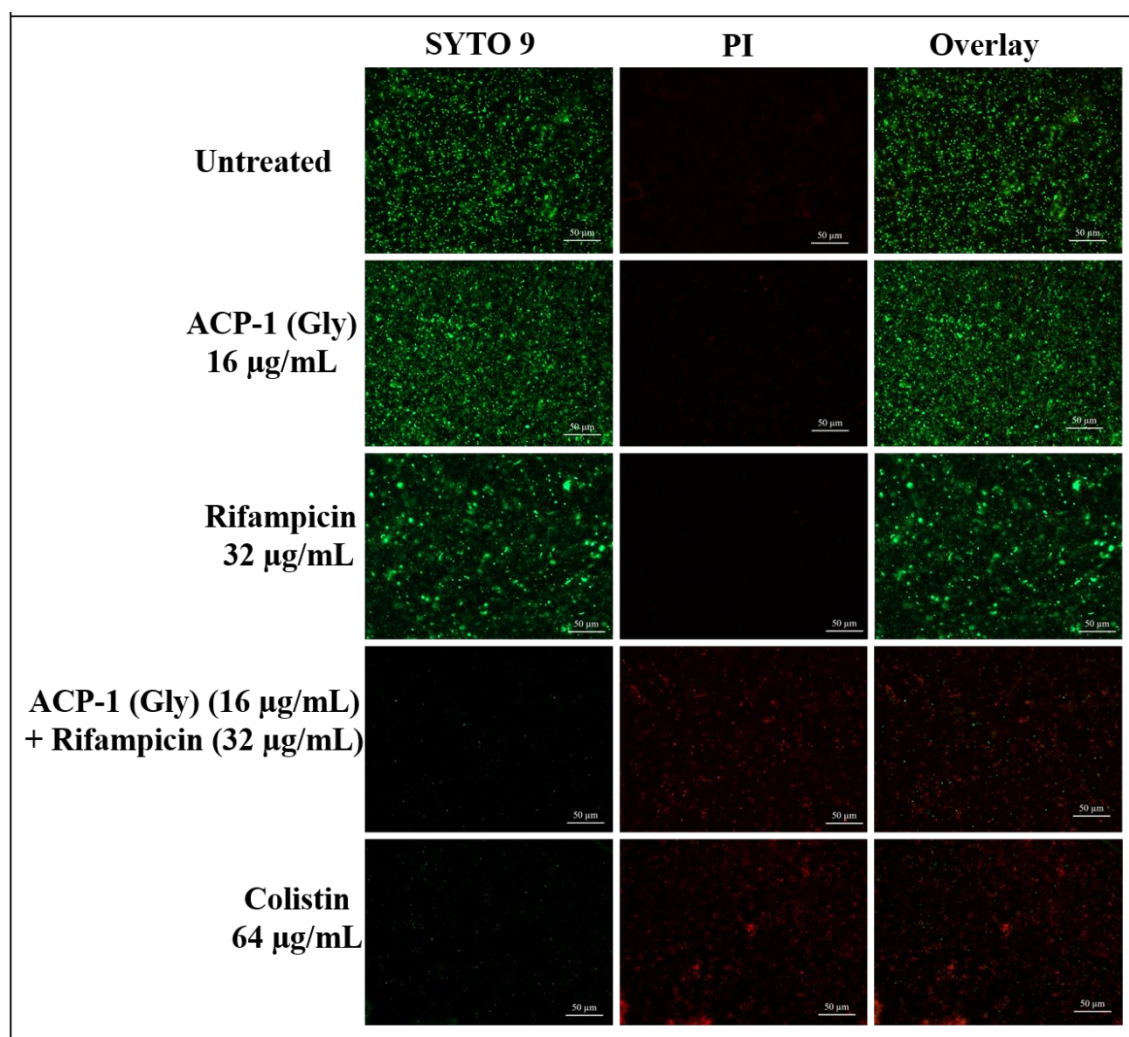

**Figure S4.** Fluorescence microscopy images of *P. aeruginosa* R590 biofilm by SYTO 9 and PI staining. The scale bar is 50 µm.

## Reference

Uppu, D. S. and Haldar, J. Lipopolysaccharide Neutralization by Cationic-Amphiphilic Polymers through Pseudoaggregate Formation. *Biomacromolecules* **2016**, *17*, 862-873.
